# Supplementary material for: Ni2+-doped ZnxCd1−xS photocatalysts from single-source precursors for efficient solar hydrogen production under visible light irradiation
Source: Royal Society of Chemistry journal article supplement (doi:10.1039/c2cy00310d), 2011-12-21
Supplement: c2cy00310d.pdf [file c2cy00310d.pdf]

## Supporting Information

# Ni<sup>2+</sup>-doped Zn<sub>x</sub>Cd<sub>1-x</sub>S photocatalysts from single-source precursors for efficient solar hydrogen production under visible light irradiation

Yabo Wang,<sup>1</sup> Jianchun Wu<sup>1</sup>, Jianwei Zheng<sup>2</sup>, Rongrong Jiang,<sup>1</sup> Rong Xu<sup>1,\*</sup>

<sup>1</sup>*School of Chemical & Biomedical Engineering, Nanyang Technological University, 62 Nanyang Drive, Singapore 637459*

<sup>2</sup>*Institute of High Performance Computing, 1 Fusionopolis Way, #16-16 Connexis, Singapore 138632*

*E-mail address: rxu@ntu.edu.sg (R. Xu).*

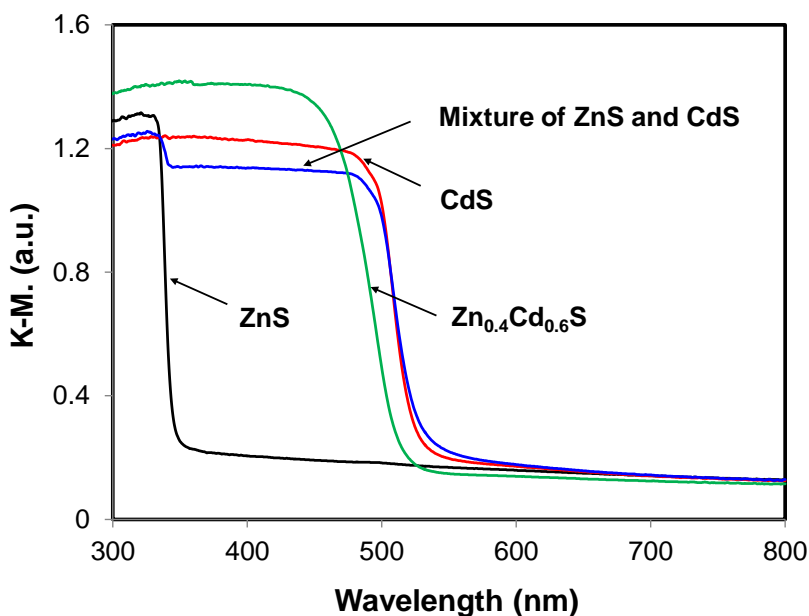

Fig. S1 UV-vis DRS of CdS, ZnS, physical mixture of CdS and ZnS, and Zn<sub>0.4</sub>Cd<sub>0.6</sub>S solid solution.

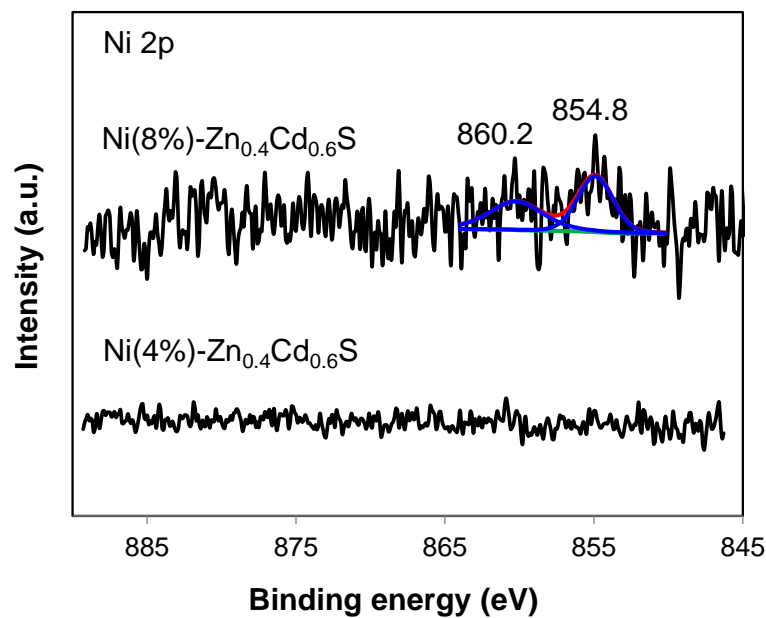

Fig. S2 XPS spectra of Ni 2p of samples Ni(4%)-Zn<sub>0.4</sub>Cd<sub>0.6</sub>S and Ni(8%)-Zn<sub>0.4</sub>Cd<sub>0.6</sub>S.

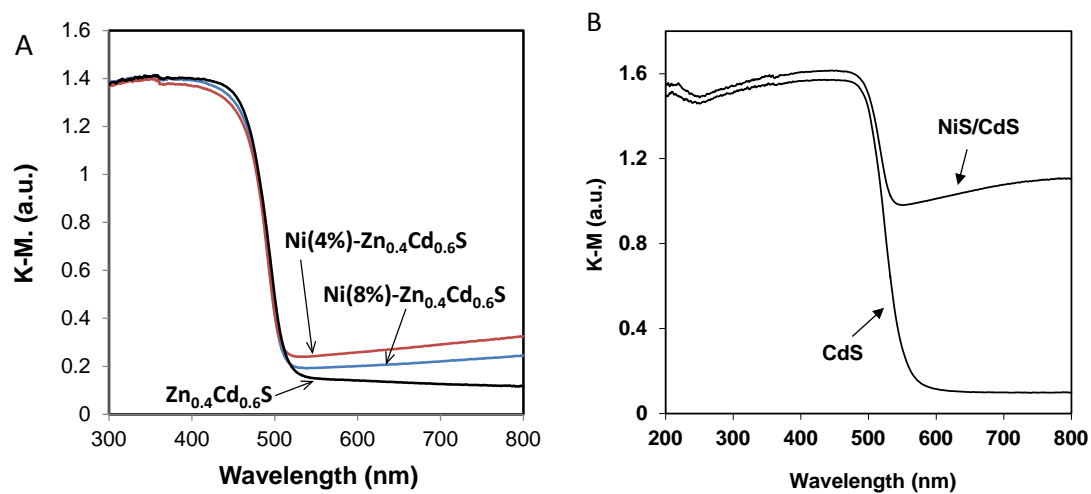

Fig. S3 UV-vis DRS spectra of (A) Ni(4%)-Zn<sub>0.4</sub>Cd<sub>0.6</sub>S and Ni(8%)-Zn<sub>0.4</sub>Cd<sub>0.6</sub>S, and (B) NiS/CdS (from Ref. 4: Zhang et al.).

We detected the formation of  $\text{S}_2\text{O}_3^{2-}$  ions during photocatalytic reaction based on the following self-redox equation.

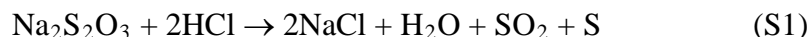

After 4 h of photocatalytic reaction, the reaction mixture was centrifuged to remove solid catalyst particles. Excess  $\text{Zn}(\text{NO}_3)_2$  was added to the clear supernatant to precipitate  $\text{S}^{2-}$  and  $\text{SO}_3^{2-}$  ions. After removing the precipitates by centrifugation, concentrated aqueous HCl (37 wt%) solution was added to the clear supernatant. The formation of elemental S precipitate with a light yellow color can be observed as shown in Fig. S4E, indicating the existence of  $\text{S}_2\text{O}_3^{2-}$  ions in the solution. Control experiments were also carried out and the results are shown in Fig. S4A-D. The presence of  $\text{S}_2\text{O}_3^{2-}$  ions in the reaction mixture implied that the reactions described in Equations 5 and 6 (Page 15) took place.

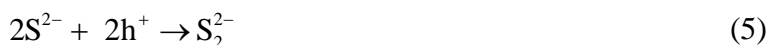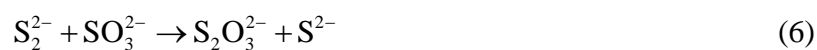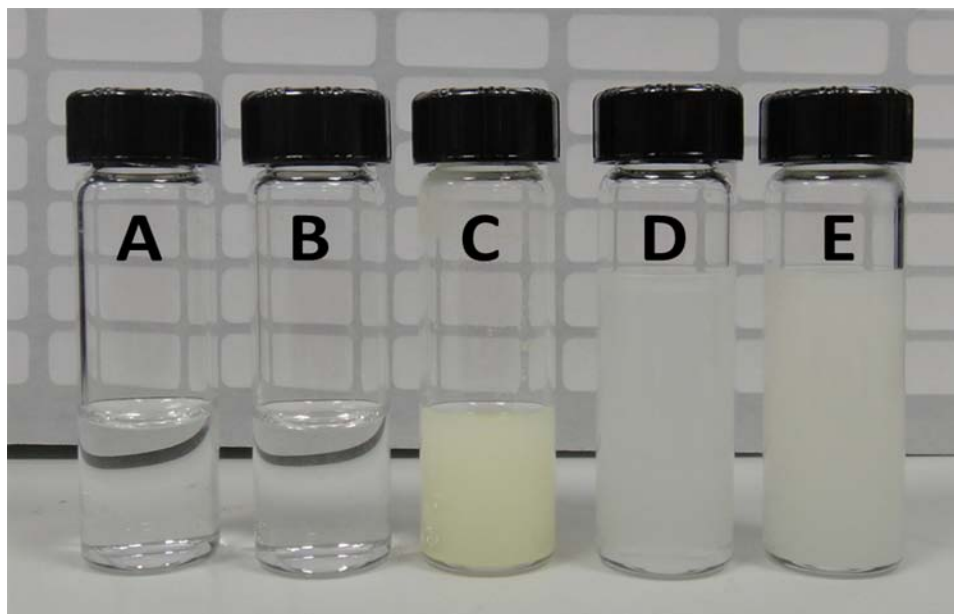

Fig. S4 Photo images of different mixtures to verify the formation of  $\text{S}_2\text{O}_3^{2-}$  in the photoreaction. (A) 2 mL of 0.1 M  $\text{Na}_2\text{SO}_3$  mixed with 1 mL of 37 wt% HCl, (B) 2 mL of 0.1 M  $\text{Na}_2\text{SO}_4$  mixed with 1 mL of 37 wt% HCl, (C) 2 mL of 0.1 M  $\text{Na}_2\text{S}_2\text{O}_3$  mixed with 1 mL of 37 wt% HCl, (D) 1 mL of 0.1 M  $\text{Na}_2\text{SO}_3$  and 1 mL of 0.1 M  $\text{Na}_2\text{SO}_4$  mixed with 2 mL 37 wt% HCl and (E) 2 mL of the reaction solution (after removal of  $\text{S}^{2-}$  and  $\text{SO}_3^{2-}$ ) mixed with 2 mL 37 wt% HCl.

To confirm the formation of  $\text{SO}_4^{2-}$  ions by Equation (4),

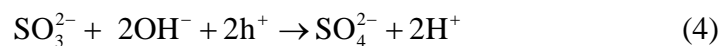

the above procedure was repeated to remove  $\text{S}^{2-}$  and  $\text{SO}_3^{2-}$  ions (by  $\text{Zn}(\text{NO}_3)_2$ ), and  $\text{S}_2\text{O}_3^{2-}$  (by  $\text{HCl}$  to form  $\text{S}$ ). High speed centrifugation was applied after precipitation to remove solids formed.  $\text{BaCl}_2$  aqueous solution was then added to the clear supernatant and the observation of white precipitate indicated the existence of  $\text{SO}_4^{2-}$  ions (Fig. S5B) and thus Equation (4) was proven to take place. A control experiment was also carried out using an aqueous solution of  $\text{Na}_2\text{S}_2\text{O}_3$  after reacted with  $\text{HCl}$  followed by centrifugation. Upon adding  $\text{BaCl}_2$  solution to the control sample, no precipitate can be observed (Fig. S5A), indicating that  $\text{SO}_2$  formed according to the above Equation S1 did not form precipitate with  $\text{BaCl}_2$ .

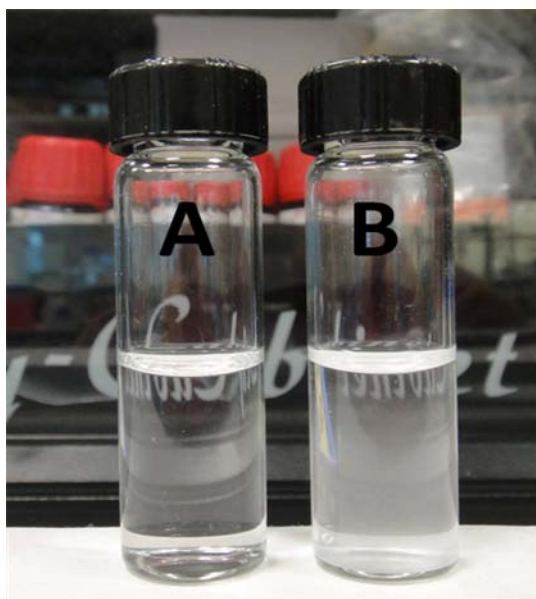

Fig. S5 Photo images of mixtures after adding  $\text{BaCl}_2$  solution to verify the formation of  $\text{SO}_4^{2-}$  in photoreaction. (A) Control sample: aqueous solution of  $\text{Na}_2\text{S}_2\text{O}_3$  after reacted with  $\text{HCl}$  followed by centrifugation; (B) photoreaction solution after removal of  $\text{S}^{2-}$ ,  $\text{SO}_3^{2-}$ , and  $\text{S}_2\text{O}_3^{2-}$ .

The above results verified the proposed reaction mechanism based on Equations 2-6 in the main text.
